# Supplementary material for: Identifying Primary Drivers of Participants from Various Socioeconomic Backgrounds to Choose National Forest Lands in the Southeastern Region of the US as a Travel Destination for Recreation
Source: MDPI journal article supplement (doi:10.3390/land11081301), 2022-08-12
Supplement: s1 [file s1]

## Section S1

# SECTION 12: NATIONAL FOREST VISITOR

Hand visitor flash card for Q11 & 12. Read them the activities for Q11 & 12 are they follow along. Choose all that apply. For Q12, have them pick only one primary activity from Q11.

**7** Did you spend last night in the (say forest name) NF?

☐ No

☐ Yes - How many nights in a row do you plan to spend in the NF? (circle in # of nights & this answer must match total time spent on Forest (Q9-Q10))

**8** When did you first arrive at this NF on this recreation visit?

☐ Same as site arrival time (not applicable to GFA)

| Date                                                                                                                                                             | Time                                                                                                                                                             |
|------------------------------------------------------------------------------------------------------------------------------------------------------------------|------------------------------------------------------------------------------------------------------------------------------------------------------------------|
| Month - Day - Year                                                                                                                                               | (military)                                                                                                                                                       |
| <div> <div>1</div><div>2</div><div>3</div><div>4</div><div>5</div><div>6</div><div>7</div><div>8</div><div>9</div><div>10</div><div>11</div><div>12</div> </div> | <div> <div>1</div><div>2</div><div>3</div><div>4</div><div>5</div><div>6</div><div>7</div><div>8</div><div>9</div><div>10</div><div>11</div><div>12</div> </div> |
| <div> <div>2016</div><div>2017</div><div>2018</div><div>2019</div> </div>                                                                                        | <div> <div>1</div><div>2</div><div>3</div><div>4</div><div>5</div><div>6</div><div>7</div><div>8</div><div>9</div><div>10</div><div>11</div><div>12</div> </div> |

**9** When do you plan to finish your visit to this National Forest?

☐ Same as interview time

| Date                                                                                                                                                             | Time                                                                                                                                                             |
|------------------------------------------------------------------------------------------------------------------------------------------------------------------|------------------------------------------------------------------------------------------------------------------------------------------------------------------|
| Month - Day - Year                                                                                                                                               | (military)                                                                                                                                                       |
| <div> <div>1</div><div>2</div><div>3</div><div>4</div><div>5</div><div>6</div><div>7</div><div>8</div><div>9</div><div>10</div><div>11</div><div>12</div> </div> | <div> <div>1</div><div>2</div><div>3</div><div>4</div><div>5</div><div>6</div><div>7</div><div>8</div><div>9</div><div>10</div><div>11</div><div>12</div> </div> |
| <div> <div>2016</div><div>2017</div><div>2018</div><div>2019</div> </div>                                                                                        | <div> <div>1</div><div>2</div><div>3</div><div>4</div><div>5</div><div>6</div><div>7</div><div>8</div><div>9</div><div>10</div><div>11</div><div>12</div> </div> |

Now, I would like to ask you a few questions about where you will go during this visit to this National Forest. When you answer please include your use of this and other areas of this National Forest. Include areas you already used as well as places you plan to use before you leave this National Forest for the last time on this visit.

**11** In which of the following activities have you participated or will you participate during this National Forest visit?

Question 11 answers (can choose more than one)

- ☐ Fishing—all types
- ☐ Hunting—all types
- ☐ **VIEWING & LEARNING NATURE & CULTURE**
  - ☐ Viewing/photographing wildlife, birds, fish, etc.
  - ☐ Viewing/photographing natural features, scenery, flowers, etc.
  - ☐ Viewing historic and prehistoric sites/areas
  - ☐ Nature study
  - ☐ Visiting a nature center, nature trail or visitor center
- ☐ **NONMOTORIZED ACTIVITIES**
  - ☐ Hiking or walking
  - ☐ Horseback riding
  - ☐ Bicycling, including mountain bikes
  - ☐ Nonmotorized water travel (canoe, sailing, raft, etc.)
  - ☐ Downhill skiing or snowboarding
  - ☐ Cross-country skiing, snowshoeing
  - ☐ Other nonmotorized activities (swimming, games, and sports)
- ☐ **MOTORIZED ACTIVITIES**
  - ☐ Driving for pleasure on roads (paved, gravel or dirt)
  - ☐ Riding on motorized trails (non-snow)
  - ☐ Riding in designated off-road vehicle areas (non-snow)
  - ☐ Snowmobile travel
  - ☐ Motorized water travel (boats, ski sleds, etc.)
  - ☐ Other motorized activities (enduro events, games, plane, etc.)
- ☐ **CAMPING OR OTHER OVERNIGHT**
  - ☐ Camping in developed sites (family or group sites)
  - ☐ Primitive camping (motorized)
  - ☐ Backpacking, camping in unroaded areas
  - ☐ Resorts, cabins, or other accommodations on FS managed lands (private or FS)
- ☐ **OTHER ACTIVITIES**
  - ☐ Gathering mushrooms, berries, firewood, or other natural products
  - ☐ Relating, hanging out, escaping heat, noise, etc.
  - ☐ Picnicking and family day gatherings in developed sites (family or group)
  - ☐ OTHER (fill in activity)

**12** Which one of those is your primary activity for this recreation visit on this NF?

Question 12 answer (choose only one)

**13** Including this visit, about how many times have you come to this National Forest for recreation in the past 12 months? (record # of times)

|    |    |    |    |    |    |    |    |    |    |    |    |
|----|----|----|----|----|----|----|----|----|----|----|----|
| 1  | 2  | 3  | 4  | 5  | 6  | 7  | 8  | 9  | 10 | 11 | 12 |
| 13 | 14 | 15 | 16 | 17 | 18 | 19 | 20 | 21 | 22 | 23 | 24 |
| 25 | 26 | 27 | 28 | 29 | 30 | 31 | 32 | 33 | 34 | 35 | 36 |
| 37 | 38 | 39 | 40 | 41 | 42 | 43 | 44 | 45 | 46 | 47 | 48 |
| 49 | 50 | 51 | 52 | 53 | 54 | 55 | 56 | 57 | 58 | 59 | 60 |

**14** How many of those visits were to participate in the main activity you identified a moment ago? (record # of times for main activity)

|    |    |    |    |    |    |    |    |    |    |    |    |
|----|----|----|----|----|----|----|----|----|----|----|----|
| 1  | 2  | 3  | 4  | 5  | 6  | 7  | 8  | 9  | 10 | 11 | 12 |
| 13 | 14 | 15 | 16 | 17 | 18 | 19 | 20 | 21 | 22 | 23 | 24 |
| 25 | 26 | 27 | 28 | 29 | 30 | 31 | 32 | 33 | 34 | 35 | 36 |
| 37 | 38 | 39 | 40 | 41 | 42 | 43 | 44 | 45 | 46 | 47 | 48 |
| 49 | 50 | 51 | 52 | 53 | 54 | 55 | 56 | 57 | 58 | 59 | 60 |

**15** About how many hours did you spend doing your main activity during this visit? (record # of hours)

|    |    |    |    |    |    |    |    |    |    |    |    |
|----|----|----|----|----|----|----|----|----|----|----|----|
| 1  | 2  | 3  | 4  | 5  | 6  | 7  | 8  | 9  | 10 | 11 | 12 |
| 13 | 14 | 15 | 16 | 17 | 18 | 19 | 20 | 21 | 22 | 23 | 24 |
| 25 | 26 | 27 | 28 | 29 | 30 | 31 | 32 | 33 | 34 | 35 | 36 |
| 37 | 38 | 39 | 40 | 41 | 42 | 43 | 44 | 45 | 46 | 47 | 48 |
| 49 | 50 | 51 | 52 | 53 | 54 | 55 | 56 | 57 | 58 | 59 | 60 |

### SECTION 3: THIS TRIP AWAY FROM HOME

**17** About how far from your home did you travel to get here? (record road miles)

|    |    |    |    |    |    |    |    |    |    |
|----|----|----|----|----|----|----|----|----|----|
| 0  | 1  | 2  | 3  | 4  | 5  | 6  | 7  | 8  | 9  |
| 10 | 11 | 12 | 13 | 14 | 15 | 16 | 17 | 18 | 19 |
| 20 | 21 | 22 | 23 | 24 | 25 | 26 | 27 | 28 | 29 |
| 30 | 31 | 32 | 33 | 34 | 35 | 36 | 37 | 38 | 39 |
| 40 | 41 | 42 | 43 | 44 | 45 | 46 | 47 | 48 | 49 |
| 50 | 51 | 52 | 53 | 54 | 55 | 56 | 57 | 58 | 59 |
| 60 | 61 | 62 | 63 | 64 | 65 | 66 | 67 | 68 | 69 |
| 70 | 71 | 72 | 73 | 74 | 75 | 76 | 77 | 78 | 79 |
| 80 | 81 | 82 | 83 | 84 | 85 | 86 | 87 | 88 | 89 |
| 90 | 91 | 92 | 93 | 94 | 95 | 96 | 97 | 98 | 99 |

**18** Which of the following choices best describe the purpose of your trip? (read list and have visitor choose only one)

- ☐ Primarily for recreation- this NF was my main destination  
☐ Primarily for recreation- my main destination was NOT this NF  
☐ Primarily for business, family, or other reasons- this NF was a side trip  
☐ Some other reason

**19** Are you staying overnight away from home on this trip?

- ☐ Yes ☐ No- (GO TO Q23)

**20** How many total nights will you be away from home? (record # nights then GO TO Q21)

|    |    |    |    |    |    |    |    |    |    |
|----|----|----|----|----|----|----|----|----|----|
| 0  | 1  | 2  | 3  | 4  | 5  | 6  | 7  | 8  | 9  |
| 10 | 11 | 12 | 13 | 14 | 15 | 16 | 17 | 18 | 19 |
| 20 | 21 | 22 | 23 | 24 | 25 | 26 | 27 | 28 | 29 |
| 30 | 31 | 32 | 33 | 34 | 35 | 36 | 37 | 38 | 39 |
| 40 | 41 | 42 | 43 | 44 | 45 | 46 | 47 | 48 | 49 |
| 50 | 51 | 52 | 53 | 54 | 55 | 56 | 57 | 58 | 59 |
| 60 | 61 | 62 | 63 | 64 | 65 | 66 | 67 | 68 | 69 |
| 70 | 71 | 72 | 73 | 74 | 75 | 76 | 77 | 78 | 79 |
| 80 | 81 | 82 | 83 | 84 | 85 | 86 | 87 | 88 | 89 |
| 90 | 91 | 92 | 93 | 94 | 95 | 96 | 97 | 98 | 99 |

**21** Of these, how many are within 50 miles of here? (record # nights)  
☐ none- (GO TO Q23)

Interviewer: Hand visitor flash card for Q22 and read them the answer choices.

**22** What types of lodging are you using within 50 miles of here? (choose all that apply)

#### ON this NF

- ☐ NF campgrounds ON this National Forest  
☐ Camping in the undeveloped area ON this National Forest  
☐ Cabins, lodges, hotels or huts, etc. ON this NF

#### OFF this NF

- ☐ Other public campground (Park Service, State Parks, County, etc.)  
☐ Private campground NOT ON this National Forest  
☐ Rented home, condo, cabin, lodge, hotel, etc. NOT ON this NF  
☐ Private home of friend or relative  
☐ A home, cabin, or condo that you own  
☐ Other

### SECTION 4: DEMOGRAPHICS

This set of questions will help us better understand you and compare your answers to those of other people. Your answers will not be used for anything other than to create general categories of recreation visitors.

**23** How many people (including you) traveled here in the same vehicle as you?

|    |    |    |    |    |    |    |    |    |    |
|----|----|----|----|----|----|----|----|----|----|
| 0  | 1  | 2  | 3  | 4  | 5  | 6  | 7  | 8  | 9  |
| 10 | 11 | 12 | 13 | 14 | 15 | 16 | 17 | 18 | 19 |
| 20 | 21 | 22 | 23 | 24 | 25 | 26 | 27 | 28 | 29 |
| 30 | 31 | 32 | 33 | 34 | 35 | 36 | 37 | 38 | 39 |
| 40 | 41 | 42 | 43 | 44 | 45 | 46 | 47 | 48 | 49 |
| 50 | 51 | 52 | 53 | 54 | 55 | 56 | 57 | 58 | 59 |
| 60 | 61 | 62 | 63 | 64 | 65 | 66 | 67 | 68 | 69 |
| 70 | 71 | 72 | 73 | 74 | 75 | 76 | 77 | 78 | 79 |
| 80 | 81 | 82 | 83 | 84 | 85 | 86 | 87 | 88 | 89 |
| 90 | 91 | 92 | 93 | 94 | 95 | 96 | 97 | 98 | 99 |

**24** How many of those people are less than 16 years old?

|    |    |    |    |    |    |    |    |    |    |
|----|----|----|----|----|----|----|----|----|----|
| 0  | 1  | 2  | 3  | 4  | 5  | 6  | 7  | 8  | 9  |
| 10 | 11 | 12 | 13 | 14 | 15 | 16 | 17 | 18 | 19 |
| 20 | 21 | 22 | 23 | 24 | 25 | 26 | 27 | 28 | 29 |
| 30 | 31 | 32 | 33 | 34 | 35 | 36 | 37 | 38 | 39 |
| 40 | 41 | 42 | 43 | 44 | 45 | 46 | 47 | 48 | 49 |
| 50 | 51 | 52 | 53 | 54 | 55 | 56 | 57 | 58 | 59 |
| 60 | 61 | 62 | 63 | 64 | 65 | 66 | 67 | 68 | 69 |
| 70 | 71 | 72 | 73 | 74 | 75 | 76 | 77 | 78 | 79 |
| 80 | 81 | 82 | 83 | 84 | 85 | 86 | 87 | 88 | 89 |
| 90 | 91 | 92 | 93 | 94 | 95 | 96 | 97 | 98 | 99 |

Interviewer: Hand visitor flash cards for Q25, 26, and 27 separately. Have them call out number for their answers.

**25** Now I would like to collect age and gender information on everyone in your group. (record everyone in group- if more than 4 people do 1st four with most recent birthday)

| Person Interviewed                 | Person 2                           | Person 3                           | Person 4                           |
|------------------------------------|------------------------------------|------------------------------------|------------------------------------|
| Gender:                            |                                    |                                    |                                    |
| <input type="radio"/> Male         | <input type="radio"/> Male         | <input type="radio"/> Male         | <input type="radio"/> Male         |
| <input type="radio"/> Female       | <input type="radio"/> Female       | <input type="radio"/> Female       | <input type="radio"/> Female       |
| Age:                               |                                    |                                    |                                    |
| <input type="radio"/> (1) under 16 |
| <input type="radio"/> (2) 16-19    |
| <input type="radio"/> (3) 20-29    |
| <input type="radio"/> (4) 30-39    |
| <input type="radio"/> (5) 40-49    |
| <input type="radio"/> (6) 50-59    |
| <input type="radio"/> (7) 60-69    |
| <input type="radio"/> (8) 70+      |

Interviewer: Direct remaining questions back to person selected for interview.

**26** Are you? (choose one)

- ☐ (1) Hispanic or Latino(a)  
☐ (2) Not Hispanic or Latino(a)  
☐ Refused

**27** With which racial group(s) do you most closely identify? (please choose one or more)

- ☐ (1) American Indian/Alaska Native  
☐ (2) Asian  
☐ (3) Black/African American  
☐ (4) Native Hawaiian or other Pacific Islander  
☐ (5) White  
☐ Refused

### SECTION 5: FOR PROXY SITES

Code = RE1, RE2:

**1** How many nights did your group stay here on this visit to this site or area?

|    |    |    |    |    |    |    |    |    |    |
|----|----|----|----|----|----|----|----|----|----|
| 0  | 1  | 2  | 3  | 4  | 5  | 6  | 7  | 8  | 9  |
| 10 | 11 | 12 | 13 | 14 | 15 | 16 | 17 | 18 | 19 |
| 20 | 21 | 22 | 23 | 24 | 25 | 26 | 27 | 28 | 29 |
| 30 | 31 | 32 | 33 | 34 | 35 | 36 | 37 | 38 | 39 |
| 40 | 41 | 42 | 43 | 44 | 45 | 46 | 47 | 48 | 49 |
| 50 | 51 | 52 | 53 | 54 | 55 | 56 | 57 | 58 | 59 |
| 60 | 61 | 62 | 63 | 64 | 65 | 66 | 67 | 68 | 69 |
| 70 | 71 | 72 | 73 | 74 | 75 | 76 | 77 | 78 | 79 |
| 80 | 81 | 82 | 83 | 84 | 85 | 86 | 87 | 88 | 89 |
| 90 | 91 | 92 | 93 | 94 | 95 | 96 | 97 | 98 | 99 |

**2** How many people (including you) were in your group?

|    |    |    |    |    |    |    |    |    |    |
|----|----|----|----|----|----|----|----|----|----|
| 0  | 1  | 2  | 3  | 4  | 5  | 6  | 7  | 8  | 9  |
| 10 | 11 | 12 | 13 | 14 | 15 | 16 | 17 | 18 | 19 |
| 20 | 21 | 22 | 23 | 24 | 25 | 26 | 27 | 28 | 29 |
| 30 | 31 | 32 | 33 | 34 | 35 | 36 | 37 | 38 | 39 |
| 40 | 41 | 42 | 43 | 44 | 45 | 46 | 47 | 48 | 49 |
| 50 | 51 | 52 | 53 | 54 | 55 | 56 | 57 | 58 | 59 |
| 60 | 61 | 62 | 63 | 64 | 65 | 66 | 67 | 68 | 69 |
| 70 | 71 | 72 | 73 | 74 | 75 | 76 | 77 | 78 | 79 |
| 80 | 81 | 82 | 83 | 84 | 85 | 86 | 87 | 88 | 89 |
| 90 | 91 | 92 | 93 | 94 | 95 | 96 | 97 | 98 | 99 |

Code = RE4, DUR4, DUR5:

**1** How many nights were you here on this visit to this site?

|    |    |    |    |    |    |    |    |    |    |
|----|----|----|----|----|----|----|----|----|----|
| 0  | 1  | 2  | 3  | 4  | 5  | 6  | 7  | 8  | 9  |
| 10 | 11 | 12 | 13 | 14 | 15 | 16 | 17 | 18 | 19 |
| 20 | 21 | 22 | 23 | 24 | 25 | 26 | 27 | 28 | 29 |
| 30 | 31 | 32 | 33 | 34 | 35 | 36 | 37 | 38 | 39 |
| 40 | 41 | 42 | 43 | 44 | 45 | 46 | 47 | 48 | 49 |
| 50 | 51 | 52 | 53 | 54 | 55 | 56 | 57 | 58 | 59 |
| 60 | 61 | 62 | 63 | 64 | 65 | 66 | 67 | 68 | 69 |
| 70 | 71 | 72 | 73 | 74 | 75 | 76 | 77 | 78 | 79 |
| 80 | 81 | 82 | 83 | 84 | 85 | 86 | 87 | 88 | 89 |
| 90 | 91 | 92 | 93 | 94 | 95 | 96 | 97 | 98 | 99 |

**2** How many people (including you) were with you in the room/site you used?

|    |    |    |    |    |    |    |    |    |    |
|----|----|----|----|----|----|----|----|----|----|
| 0  | 1  | 2  | 3  | 4  | 5  | 6  | 7  | 8  | 9  |
| 10 | 11 | 12 | 13 | 14 | 15 | 16 | 17 | 18 | 19 |
| 20 | 21 | 22 | 23 | 24 | 25 | 26 | 27 | 28 | 29 |
| 30 | 31 | 32 | 33 | 34 | 35 | 36 | 37 | 38 | 39 |
| 40 | 41 | 42 | 43 | 44 | 45 | 46 | 47 | 48 | 49 |
| 50 | 51 | 52 | 53 | 54 | 55 | 56 | 57 | 58 | 59 |
| 60 | 61 | 62 | 63 | 64 | 65 | 66 | 67 | 68 | 69 |
| 70 | 71 | 72 | 73 | 74 | 75 | 76 | 77 | 78 | 79 |
| 80 | 81 | 82 | 83 | 84 | 85 | 86 | 87 | 88 | 89 |
| 90 | 91 | 92 | 93 | 94 | 95 | 96 | 97 | 98 | 99 |

Code = FR1, ST1:

**1** What kind of ticket/pass did you use today?

- ☐ DID NOT USE ONE (SKIP Q2)  
☐ SINGLE DAY/PART OF DAY (SKIP Q2)  
☐ MULTIPLE DAY (points, season, multi-day, etc.) (GO TO Q2)

**2** How many total days do you plan to use THIS ticket/pass THIS season?

|    |    |    |    |    |    |    |    |    |    |
|----|----|----|----|----|----|----|----|----|----|
| 0  | 1  | 2  | 3  | 4  | 5  | 6  | 7  | 8  | 9  |
| 10 | 11 | 12 | 13 | 14 | 15 | 16 | 17 | 18 | 19 |
| 20 | 21 | 22 | 23 | 24 | 25 | 26 | 27 | 28 | 29 |
| 30 | 31 | 32 | 33 | 34 | 35 | 36 | 37 | 38 | 39 |
| 40 | 41 | 42 | 43 | 44 | 45 | 46 | 47 | 48 | 49 |
| 50 | 51 | 52 | 53 | 54 | 55 | 56 | 57 | 58 | 59 |
| 60 | 61 | 62 | 63 | 64 | 65 | 66 | 67 | 68 | 69 |
| 70 | 71 | 72 | 73 | 74 | 75 | 76 | 77 | 78 | 79 |
| 80 | 81 | 82 | 83 | 84 | 85 | 86 | 87 | 88 | 89 |
| 90 | 91 | 92 | 93 | 94 | 95 | 96 | 97 | 98 | 99 |

Code = MA2, FR2, FR5, FE4, SUP4:

**1** How many fee envelopes/permits/tickets were used to cover you on this visit to this site?

|    |    |    |    |    |    |    |    |    |    |
|----|----|----|----|----|----|----|----|----|----|
| 0  | 1  | 2  | 3  | 4  | 5  | 6  | 7  | 8  | 9  |
| 10 | 11 | 12 | 13 | 14 | 15 | 16 | 17 | 18 | 19 |
| 20 | 21 | 22 | 23 | 24 | 25 | 26 | 27 | 28 | 29 |
| 30 | 31 | 32 | 33 | 34 | 35 | 36 | 37 | 38 | 39 |
| 40 | 41 | 42 | 43 | 44 | 45 | 46 | 47 | 48 | 49 |
| 50 | 51 | 52 | 53 | 54 | 55 | 56 | 57 | 58 | 59 |
| 60 | 61 | 62 | 63 | 64 | 65 | 66 | 67 | 68 | 69 |
| 70 | 71 | 72 | 73 | 74 | 75 | 76 | 77 | 78 | 79 |
| 80 | 81 | 82 | 83 | 84 | 85 | 86 | 87 | 88 | 89 |
| 90 | 91 | 92 | 93 | 94 | 95 | 96 | 97 | 98 | 99 |

**2** How many people (including you) were represented by the fee envelopes/permits/tickets that covered you?

|    |    |    |    |    |    |    |    |    |    |
|----|----|----|----|----|----|----|----|----|----|
| 0  | 1  | 2  | 3  | 4  | 5  | 6  | 7  | 8  | 9  |
| 10 | 11 | 12 | 13 | 14 | 15 | 16 | 17 | 18 | 19 |
| 20 | 21 | 22 | 23 | 24 | 25 | 26 | 27 | 28 | 29 |
| 30 | 31 | 32 | 33 | 34 | 35 | 36 | 37 | 38 | 39 |
| 40 | 41 | 42 | 43 | 44 | 45 | 46 | 47 | 48 | 49 |
| 50 | 51 | 52 | 53 | 54 | 55 | 56 | 57 | 58 | 59 |
| 60 | 61 | 62 | 63 | 64 | 65 | 66 | 67 | 68 | 69 |
| 70 | 71 | 72 | 73 | 74 | 75 | 76 | 77 | 78 | 79 |
| 80 | 81 | 82 | 83 | 84 | 85 | 86 | 87 | 88 | 89 |
| 90 | 91 | 92 | 93 | 94 | 95 | 96 | 97 | 98 | 99 |

[illegible]

1000

- 



Living (y) v. rest

units 4

\_\_\_\_\_

—

- \_\_\_\_\_  
 \_\_\_\_\_  
 \_\_\_\_\_  
 \_\_\_\_\_  
 \_\_\_\_\_  
 \_\_\_\_\_  
 \_\_\_\_\_  
 \_\_\_\_\_



ehi  
ur M

—

430076

PLEASE DO NOT WRITE IN THIS AREA

## Section S2

Table S1. Mean values (SD) of the variables included in the model.

| Forest code       | (Daniel Boone)   | (Chattahoochee-Oconee) | (Cherokee)       | (Apalachicola, Osceola, Ocala) | (Kisatchie)      | (George Washington-Jefferson) | (Ozark)          | All forests      |
|-------------------|------------------|------------------------|------------------|--------------------------------|------------------|-------------------------------|------------------|------------------|
| Number of visits  | 12.81<br>(30.26) | 19.16<br>(47.38)       | 22.25<br>(45.67) | 25.20<br>(66.73)               | 17.53<br>(39.54) | 20.78<br>(48.10)              | 11.87<br>(37.70) | 17.56<br>(43.16) |
| Number under 16   | 0.47<br>(0.96)   | 0.39<br>(0.88)         | 0.61<br>(1.33)   | 0.60<br>(1.24)                 | 0.85<br>(1.40)   | 0.54<br>(1.08)                | 1.12<br>(2.60)   | 0.53<br>(1.27)   |
| People in vehicle | 2.67<br>(1.58)   | 2.40<br>(1.30)         | 3.00<br>(3.17)   | 2.68<br>(1.83)                 | 2.80<br>(1.76)   | 2.54<br>(1.53)                | 3.24<br>(2.90)   | 2.61<br>(2.20)   |
| Gender (male=1)   | 0.62<br>(0.33)   | 0.73<br>(0.39)         | 0.62<br>(0.36)   | 0.73<br>(0.38)                 | 0.68<br>(0.34)   | 0.67<br>(0.35)                | 0.65<br>(0.36)   | 0.69<br>(0.39)   |
| Age (>60=1)       | 0.12<br>(0.33)   | 0.18<br>(0.39)         | 0.15<br>(0.36)   | 0.17<br>(0.38)                 | 0.13<br>(0.34)   | 0.14<br>(0.35)                | 0.15<br>(0.36)   | 0.18<br>(0.39)   |
| White (white=1)   | 0.94<br>(0.23)   | 0.94<br>(0.25)         | 0.95<br>(0.22)   | 0.91<br>(0.28)                 | 0.96<br>(0.20)   | 0.94<br>(0.24)                | 0.90<br>(0.30)   | 0.94<br>(0.23)   |
| Water             | 0.20<br>(0.40)   | 0.14<br>(0.35)         | 0.29<br>(0.45)   | 0.44<br>(0.50)                 | 0.25<br>(0.43)   | 0.16<br>(0.37)                | 0.18<br>(0.38)   | 0.24<br>(0.43)   |
| Trail             | 0.72<br>(0.45)   | 0.64<br>(0.48)         | 0.73<br>(0.45)   | 0.51<br>(0.50)                 | 0.54<br>(0.50)   | 0.72<br>(0.45)                | 0.38<br>(0.49)   | 0.61<br>(0.49)   |
| Viewing           | 0.73<br>(0.44)   | 0.67<br>(0.47)         | 0.88<br>(0.33)   | 0.77<br>(0.42)                 | 0.75<br>(0.44)   | 0.62<br>(0.49)                | 0.71<br>(0.46)   | 0.66<br>(0.47)   |
| Picnicking        | 0.28<br>(0.45)   | 0.13<br>(0.34)         | 0.34<br>(0.47)   | 0.31<br>(0.46)                 | 0.32<br>(0.47)   | 0.17<br>(0.38)                | 0.29<br>(0.45)   | 0.23<br>(0.42)   |

Table S1. Mean values (SD) of the variables included in the model.

| Forest code         | (Daniel Boone) | (Chattahoochee-Oconee) | (Cherokee) | (Apalachicola, Osceola, Ocala) | (Kisatchie) | (George Washington-Jefferson) | (Ozark) | All forests |
|---------------------|----------------|------------------------|------------|--------------------------------|-------------|-------------------------------|---------|-------------|
| Education.s         | 0.22           | 0.10                   | 0.19       | 0.23                           | 0.16        | 0.14                          | 0.13    | 0.16        |
| d                   | (0.42)         | (0.31)                 | (0.39)     | (0.42)                         | (0.36)      | (0.34)                        | (0.33)  | (0.37)      |
| R_Vehicle           | 0.02           | 0.03                   | 0.02       | 0.09                           | 0.08        | 0.01                          | 0.04    | 0.04        |
|                     | (0.14)         | (0.16)                 | (0.15)     | (0.28)                         | (0.26)      | (0.11)                        | (0.19)  | (0.20)      |
| Gathering           | 0.08           | 0.07                   | 0.13       | 0.18                           | 0.25        | 0.05                          | 0.11    | 0.11        |
|                     | (0.27)         | (0.26)                 | (0.33)     | (0.39)                         | (0.43)      | (0.22)                        | (0.31)  | (0.31)      |
| Travel cost (\$)    | 51.34          | 44.65                  | 36.68      | 30.74                          | 26.08       | 39.82                         | 41.16   | 40.33       |
|                     | (47.55)        | (52.12)                | (45.61)    | (33.15)                        | (31.00)     | (44.01)                       | (44.28) | (47.36)     |
|                     |                |                        | )          |                                |             |                               | )       |             |
| White.x.Travel cost | 48.03          | 41.66                  | 34.46      | 28.31                          | 25.02       | 37.74                         | 38.66   | 38.21       |
|                     | (47.53)        | (51.12)                | (44.75)    | (32.71)                        | (30.24)     | (44.24)                       | (45.38) | (47.06)     |
|                     |                |                        | )          |                                |             |                               | )       |             |
| white.x.Water       | 0.19           | 0.13                   | 0.27       | 0.41                           | 0.23        | 0.15                          | 0.16    | 0.23        |
|                     | (0.39)         | (0.34)                 | (0.44)     | (0.49)                         | (0.42)      | (0.36)                        | (0.36)  | (0.42)      |
| white.x.Trail       | 0.67           | 0.60                   | 0.68       | 0.47                           | 0.52        | 0.68                          | 0.36    | 0.58        |
|                     | (0.47)         | (0.49)                 | (0.46)     | (0.50)                         | (0.50)      | (0.47)                        | (0.48)  | (0.49)      |
| white.x.Viewing     | 0.69           | 0.62                   | 0.83       | 0.70                           | 0.71        | 0.58                          | 0.64    | 0.62        |
|                     | (0.46)         | (0.48)                 | (0.38)     | (0.46)                         | (0.45)      | (0.49)                        | (0.48)  | (0.48)      |
| white.x.            | 0.26           | 0.12                   | 0.32       | 0.28                           | 0.30        | 0.16                          | 0.23    | 0.21        |
| Picnicking          | (0.44)         | (0.33)                 | (0.47)     | (0.45)                         | (0.46)      | (0.37)                        | (0.42)  | (0.41)      |
| white.x.            | 0.21           | 0.10                   | 0.18       | 0.21                           | 0.15        | 0.13                          | 0.12    | 0.15        |
| Education           | (0.41)         | (0.30)                 | (0.38)     | (0.41)                         | (0.36)      | (0.33)                        | (0.33)  | (0.36)      |
| white.x.            | 0.02           | 0.02                   | 0.02       | 0.08                           | 0.07        | 0.01                          | 0.03    | 0.04        |
| R_vehickel          | (0.14)         | (0.15)                 | (0.15)     | (0.27)                         | (0.26)      | (0.10)                        | (0.18)  | (0.19)      |
| white.x.            | 0.08           | 0.06                   | 0.12       | 0.17                           | 0.24        | 0.05                          | 0.10    | 0.10        |
| Gathering           | (0.27)         | (0.25)                 | (0.32)     | (0.38)                         | (0.43)      | (0.22)                        | (0.30)  | (0.31)      |

Table S1. Mean values (SD) of the variables included in the model.

|             |                |                        |            |                                |              |                               |         |             |
|-------------|----------------|------------------------|------------|--------------------------------|--------------|-------------------------------|---------|-------------|
| Forest code | (Daniel Boone) | (Chattahoochee-Oconee) | (Cherokee) | (Apalachicola, Osceola, Ocala) | (Kisatchie ) | (George Washington-Jefferson) | (Ozark) | All forests |
|             |                |                        |            |                                |              |                               |         |             |
|             |                |                        |            |                                |              |                               |         |             |
